# Supplementary material for: Control of parallel hippocampal output pathways by amygdalar long-range inhibition
Source: eLife. 2021 Nov 30;10:e74758. doi: 10.7554/eLife.74758 (PMC8654375; doi:10.7554/eLife.74758)
Supplement: Figure 1—source data 1. [file elife-74758-fig1-data1.xlsx]

## Sheet: Sheet1
1D		region
	injection	COAa	COApm	MEAa	MEAp	PAA	COApl	LA	PA	BMAa	BMAp	CEAc	CEAm	CEAl	BLAa	BLAp	BLAv
	A	0.020872	0.09833	0.024583	0.00974	0.056122	0.099722	0.156772	0.064935	0.042208	0.116419	0.019017	0.007421	0.007421	0.145176	0.097403	0.033859
	B	0.012146	0.12915	0.057895	0.02915	0.042915	0.140081	0.151417	0.042915	0.018623	0.123077	0.030364	0.015385	0.004858	0.05668	0.119838	0.025506
	C	0.002285	0.134806	0.022087	0.010663	0.095963	0.167555	0.130236	0.04722	0.014471	0.11805	0.00457	0.003808	0.001523	0.080731	0.124905	0.041127
	D	0.032768	0.097175	0.035593	0.022599	0.102825	0.124294	0.170056	0.021469	0.044068	0.135593	0.00904	0.000565	0.008475	0.054237	0.097175	0.044068
	E	0.008364	0.079926	0.05855	0.006506	0.086431	0.137546	0.077138	0.011152	0.017658	0.225836	0.003717	0.001859	0.003717	0.111524	0.07342	0.096654
	F	0.012675	0.077023	0.065648	0.019175	0.087098	0.111797	0.078323	0.038674	0.013	0.161521	0.021449	0.0182	0.014625	0.168346	0.066948	0.045499
	G	0.010164	0.089914	0.030493	0.006255	0.06724	0.195465	0.121188	0.020328	0.021892	0.204848	0.000782	0.000782	0	0.057858	0.12588	0.046912
	H	0.007597	0.165746	0.040055	0.005525	0.043508	0.09116	0.121547	0.054558	0.020718	0.148481	0.004144	0.002762	0.001381	0.031768	0.234116	0.026934
	I	0.012177	0.119736	0.046677	0.009893	0.039066	0.124049	0.158295	0.022831	0.028666	0.127854	0.029934	0.008879	0.005581	0.148656	0.099696	0.018011
	J	0.011696	0.163743	0.02729	0.004873	0.04386	0.091618	0.124756	0.040936	0.037037	0.090643	0.018519	0.007797	0.002924	0.149123	0.164717	0.020468
