# Supplementary material for: Control of parallel hippocampal output pathways by amygdalar long-range inhibition
Source: eLife. 2021 Nov 30;10:e74758. doi: 10.7554/eLife.74758 (PMC8654375; doi:10.7554/eLife.74758)
Supplement: Figure 2—source data 1. [file elife-74758-fig2-data1.xlsx]

## Sheet: Sheet1
	2C			2E			2G				2I
	Baseline	NBQX		Baseline	GZ		baseline	NBQX	GZ		baseline	NBQX	GZ
	-31.8542	-2.52187		236.899	0.700908		54.5468	1.1337	0.333444		7.75622	33.5975	7.33462
	-102.283	-5.40381		122.838	-0.10885		722.647	1.68869	1.12014		75.6893	34.8804	4.4557
	-156.294	-2.19937		255.498	0.36317		22.4085	0.302927	1.0738		26.6743	20.3773	1.23205
	-136.088	-2.30617		900.937	-0.015267						83.8196	62.8862	0.062167
	-11.6896	-1.82704		169.68	0.367238						12.9794	12.1837	2.0583
	-28.2378	-0.695817		80.2667	0.487278						58.5187	65.9302	5.18476
	-30.0058	-1.2594		78.2718	0.678527
	-111.58	-1.99897		44.3841	1.82501
	-379.053	-1.63174		41.1328	0.870795
				546.167	1.01423
				404.752	0.203457
				3.82702	0.303151
