# Supplementary material for: Control of parallel hippocampal output pathways by amygdalar long-range inhibition
Source: eLife. 2021 Nov 30;10:e74758. doi: 10.7554/eLife.74758 (PMC8654375; doi:10.7554/eLife.74758)
Supplement: Figure 3—source data 1. [file elife-74758-fig3-data1.xlsx]

## Sheet: Sheet1
	3D
	NAc		PFC		BA
	PFC	BA	NAc	BA	PFC	NAc
	0.03	0.22	0.2	0.2	0.08	0.06
	0	0.1	0	0	0	0.1
	0	0.03	0	0	0	0.03
	0	0.05	0	0.8	0.04	0.05
		0.1		0	0	0.16
		0				0
		0				0
