# Supplementary material for: Control of parallel hippocampal output pathways by amygdalar long-range inhibition
Source: eLife. 2021 Nov 30;10:e74758. doi: 10.7554/eLife.74758 (PMC8654375; doi:10.7554/eLife.74758)
Supplement: Figure 4—source data 1. [file elife-74758-fig4-data1.xlsx]

## Sheet: Sheet1
4C				4F				4I			4L
BA	NAc			BA	PFC			BA	NAc		BA	PFC
245.727	86.1904			446.441	0.978639			434.715	109.909		38.0639	5.64755
111.946	14.539			49.0107	13.4281			227.175	118.955		185.246	4.01542
86.4935	127.82			28.0079	1.84332			123.029	40.3792		50.3877	4.1672
153.565	241.829			101.737	79.6696			190.669	158.15		57.3361	1.63864
178.017	141.352			17.2816	0.724304			153.107	31.8011		80.0928	9.50672
30.5551	41.3017			258.699	8.24407			361.644	3.43801		86.7849	2.05776
140.784	17.5197			295.91	2.53507			40.9794	34.8538		31.7791	14.4678
472.302	33.9671			184.456	3.92672
11.5462	88.1802
Ratio				Ratio				Ratio			Ratio
0.350757				0.00219209				0.252831			0.14837
0.129875				0.273984				0.523629			0.021676
1.47779				0.0658142				0.328209			0.082703
1.57476				0.783097				0.829445			0.02858
0.794036				0.0419118				0.207705			0.118696
1.35171				0.0318674				0.009507			0.023711
0.124444				0.00856705				0.850518			0.455261
0.0719181				0.0212881
7.63719
