# Supplementary material for: Control of parallel hippocampal output pathways by amygdalar long-range inhibition
Source: eLife. 2021 Nov 30;10:e74758. doi: 10.7554/eLife.74758 (PMC8654375; doi:10.7554/eLife.74758)
Supplement: Figure 5—source data 1. [file elife-74758-fig5-data1.xlsx]

## Sheet: Sheet1
5B		5D		5F		5H		5K			5N			5P
Amplitudes		Amplitudes		Amplitudes		Amplitudes		BA	NAc		BA	NAc		BA	NAc
-65.5395		-8.66319		-82.9697		-7.16269		91.8453	134.484		116.094	1.88452		11.9784	58.8911
-152.697		-32.2276		-138.589		-35.607		246.222	417.997		49.7668	149.262		0.709814	12.6583
-220.057		-7.39158		-6.14846		-85.7713		100.588	287.189		1.49541	5.78071		11.004	12.4991
-100.282		-14.128		-232.948		-53.5783		124.137	311.978		54.8468	28.5806		5.18891	2.68461
-179.756		-180.806		-7.71915		-59.1082		95.7924	425.243		24.5343	23.456		44.8269	142.568
-111.168		-149.162		-41.4624		-114.14		61.384	17.9263		125.896	114.462		57.7311	59.71
-14.5339		-37.7778		-149.136		-29.6762		117.34	345.466		56.182	68.598		56.6006	79.8507
				-112.682		-8.96838		252.33	528.702		73.837	30.6965		1.13173	7.15913
				-30.6345		-100.181		97.0887	236.036		1.2004	11.5538
				-87.8485		-155.291		212.115	367.713		8.3519	4.72528
				-73.7002		-22.7322
				-40.9436		-45.6699
				-257.241		-281.562		Ratio			Ratio			Ratio
				-159.052		-76.4774		1.46425			0.016233			7.81171
						-30.3303		1.69764			2.99923			16.3499
						-55.0788		2.85511			3.86564			6.85557
						-95.0316		2.51318			0.521098			0.69018
						-55.3067		4.43922			0.956049			2.463
						-188.324		0.292035			0.909177			0.802593
						-92.6379		2.94416			1.221			1.83716
						-312.066		2.09528			0.415734			4.64744
						-318.973		2.43114			9.62497
								1.73355			0.565774
