# Supplementary material for: Control of parallel hippocampal output pathways by amygdalar long-range inhibition
Source: eLife. 2021 Nov 30;10:e74758. doi: 10.7554/eLife.74758 (PMC8654375; doi:10.7554/eLife.74758)
Supplement: Figure 6—source data 1. [file elife-74758-fig6-data1.xlsx]

## Sheet: Sheet1
6C							6D
iteration	inh_ratio	NAc_total_spikes	BMA_total_spikes	PFC_total_spikes			iteration	LRIP_ratio	Int_total_spikes
1	0	9	1317	0			1	0	543
1	0.1	789	406	0			1	0.1	458
1	0.2	997	39	0			1	0.2	308
1	0.3	1125	21	0			1	0.3	182
1	0.4	1240	2	0			1	0.4	171
1	0.5	977	0	0			1	0.5	145
1	0.6	73	0	0			1	0.6	152
1	0.7	1	0	0			1	0.7	138
2	0	125	1364	0			2	0	665
2	0.1	772	436	0			2	0.1	489
2	0.2	1010	66	0			2	0.2	334
2	0.3	1147	2	0			2	0.3	185
2	0.4	1164	0	0			2	0.4	165
2	0.5	585	0	0			2	0.5	141
2	0.6	238	0	0			2	0.6	139
2	0.7	14	0	0			2	0.7	146
3	0	86	1337	0			3	0	689
3	0.1	550	747	0			3	0.1	486
3	0.2	897	76	0			3	0.2	320
3	0.3	1170	17	0			3	0.3	187
3	0.4	1148	0	0			3	0.4	168
3	0.5	1000	0	0			3	0.5	153
3	0.6	91	0	0			3	0.6	151
3	0.7	37	0	0			3	0.7	121
4	0	7	1396	0			4	0	620
4	0.1	559	530	0			4	0.1	416
4	0.2	1110	127	0			4	0.2	325
4	0.3	1046	15	0			4	0.3	202
4	0.4	1195	0	0			4	0.4	186
4	0.5	781	0	0			4	0.5	158
4	0.6	90	0	0			4	0.6	150
4	0.7	5	0	0			4	0.7	140
5	0	12	1415	0			5	0	673
5	0.1	607	511	0			5	0.1	440
5	0.2	887	151	0			5	0.2	329
5	0.3	1180	1	0			5	0.3	233
5	0.4	1113	0	0			5	0.4	160
5	0.5	650	0	0			5	0.5	151
5	0.6	385	0	0			5	0.6	136
5	0.7	30	0	0			5	0.7	142
