# Supplementary material for: Control of parallel hippocampal output pathways by amygdalar long-range inhibition
Source: eLife. 2021 Nov 30;10:e74758. doi: 10.7554/eLife.74758 (PMC8654375; doi:10.7554/eLife.74758)
Supplement: Figure 7—source data 1. [file elife-74758-fig7-data1.xlsx]

## Sheet: Sheet1
7C							7I							7K
p stim side			distance				p stim side			distance				p stim side			distance
GFP	ChR2		GFP	ChR2			DMSO	SALB		DMSO	SALB			DMSO	SALB		DMSO	SALB
0.456404	0.619594		50.7788	77.2513			0.583025	0.798946		37.1306	33.1268			0.7	0.156407		22.5789	16.9777
0.681989	0.679979		58.6215	68.4117			0.774736	0.702292		33.7189	29.793			0.816167	0.58914		35.2644	40.37
0.290153	0.567939		30.5678	41.0541			0.695575	0.68549		50.0277	46.2708			0.705853	0.440947		25.3856	21.6537
0.698493	0.671764		45.5683	58.7665			0.583779	0.648066		118.805	24.52			0.758296	0.246973		43.1471	32.9452
0.399188	0.706403		47.677	28.489			0.661924	0.760734		44.5414	27.7953			0.717962	0.469627		32.7596	27.6445
0.322288	0.671361		49.5393	105.647			0.893862	0.688921		54.2027	61.1251			0.495343	0.406606		69.1212	24.2836
	0.671003			30.6292			0.754372	0.548748		21.7145	55.1176			0.727252	0.543881		52.2	60.7156
	0.782916			68.378			0.918128	0.607898		41.1951	19.8568
							0.833512	0.696114		18.9875	26.595
