# Supplementary material for: Control of parallel hippocampal output pathways by amygdalar long-range inhibition
Source: eLife. 2021 Nov 30;10:e74758. doi: 10.7554/eLife.74758 (PMC8654375; doi:10.7554/eLife.74758)
Supplement: Figure 8—source data 1. [file elife-74758-fig8-data1.xlsx]

## Sheet: Sheet1
8C							8I							8K
p stim side			distance				p stim side			distance				p stim side			distance
GFP	ChR2		GFP	ChR2			DMSO	SALB		DMSO	SALB			DMSO	SALB		DMSO	SALB
0.362066	0.742342		56.9745	46.5122			0.517447	0.410946		43.2669	37.3988			0.61799	0.800381		64.672	51.3044
0.687508	0.54694		60.8531	55.4002			0.452985	0.479039		48.9888	32.2784			0.564498	0.728444		54.7013	47.463
0.547998	0.480016		38.9724	59.4671			0.333177	0.426449		357.482	65.0505			0.361687	0.700223		36.0219	35.8594
0.416533	0.475276		55.7852	64.2597			0.487204	0.40054		35.3641	58.515			0.335544	0.426327		48.1382	38.4293
	0.603663			45.0755			0.748652	0.72705		45.9034	69.7594			0.631507	0.748202		69.8596	45.7701
	0.650477			66.3783			0.347352	0.374782		60.4453	61.02			0.264631	0.935891		34.006	15.5477
	0.284754			38.4632			0.161785	0.311293		48.9416	99.5468			0.451685	0.591629		48.5603	36.7136
							0.689073	0.492505		23.3139	32.1581
							0.621556	0.26693		24.7474	25.8288
